# Supplementary material
Source: Elsevier journal article supplement (https://www.sciencedirect.com/science/article/pii/S0021755723000037)
Supplement: mmc1 [file S0021755723000037:mmc1.pdf]

## SUPPLEMENTARY MATERIAL

| Intermediate Categories                             | Guiding Concept                                                                                                                                                 | Final Categories                    |
|-----------------------------------------------------|-----------------------------------------------------------------------------------------------------------------------------------------------------------------|-------------------------------------|
| I. Professional service/team                        | Speech about the team's "service", in a general way, without specifying characteristics. Or that use the nomenclature "service" as the objective of the answer. | 1. Care and treatment               |
| II. Service efficiency                              | Speech regarding the quality of treatment/service provided by the PICU professionals.                                                                           |                                     |
| III. Specific acknowledgment to a professional      | Praise or specific thanks to a particular professional.                                                                                                         | 2. Professional attitude            |
| IV. Positive characteristics of professionals /team | Central speech referring to adjectives or positive characteristics of the professionals or the care provided by the team.                                       |                                     |
| V. Negative characteristics of professionals /team  | Central speech referring to adjectives or characteristics seen as negative in relation to professionals or team service.                                        | 3. Professional attitude (negative) |
| VI. Structure and organization of the PICU          | Positive speech related to the structure and organization of the PICU team.                                                                                     | 4. Organization                     |
| VII. Lack of structure and organization of the PICU | Speech related to an inadequate structure and lack of organization of the PICU team.                                                                            | 5. Organization (negative)          |
| VIII. Adequate team/professional communication      | Speech referring to a clear and important means of communication between the team and the parentes.                                                             | 6. Information                      |
| IX. Lack of team/professional communication         | Poor communication and exchange of information with the team.                                                                                                   | 7. Information (negative)           |
| X. Confidence in the team                           | Speech referring to the feeling of security and trust in the team.                                                                                              | 8. Parent participation             |
| XI. Patient/Family Care                             | Affirmation related to feeling cared for or feeling part of the team, creating affective bonds with professionals.                                              |                                     |

## Net Promoter Score (NPS)

Assinale:

Numa escala de 0 a 10, qual é a probabilidade de você recomendar essa UTI  
Pediátrica para algum amigo ou familiar?

|                |   |   |   |   |                |   |   |   |   |    |
|----------------|---|---|---|---|----------------|---|---|---|---|----|
| 0              | 1 | 2 | 3 | 4 | 5              | 6 | 7 | 8 | 9 | 10 |
| Pouco provável |   |   |   |   | Muito provável |   |   |   |   |    |

Qual é o motivo mais importante para nota que você deu?

---

---

---

---

---

### Questionário EMPATHIC-30

#### Questionário de Avaliação da Satisfação dos pais em Unidade de Terapia Intensiva Pediátrica (EMPATHIC-30)

##### Informações

- Todos os dias conversávamos com os médicos sobre o cuidado e o tratamento do nosso filho ☐
- Todos os dias conversávamos com os enfermeiros sobre o cuidado e o tratamento do nosso filho ☐
- O médico nos informou claramente sobre as consequências do tratamento do nosso filho ☐
- Recebemos informações claras sobre a realização e resultado dos exames e testes ☐
- Recebemos informações compreensíveis sobre os efeitos dos medicamentos ☐

##### Cuidado e tratamento

- Os médicos e enfermeiros trabalharam em conjunto ☐
- A equipe médica nos preparou bem para a alta do nosso filho ☐
- As enfermeiras nos prepararam bem para a alta do nosso filho ☐
- A equipe estava atenta à prevenção e ao tratamento da dor do nosso filho ☐
- Os médicos levaram em conta o conforto do nosso filho ☐
- Os enfermeiros levaram em conta o conforto do nosso filho ☐
- Todos os dias sabíamos quem era o médico responsável pelo nosso filho ☐
- Todos os dias sabíamos quem era a enfermeira responsável pelo nosso filho ☐

##### Organização

- A equipe trabalhou de forma eficiente ☐
- Podíamos facilmente obter informações da UTIP por telefone quando necessário ☐
- Havia espaço suficiente ao redor da cama do nosso filho ☐
- A UTI estava limpa ☐
- O barulho da UTI era abafado na medida do possível ☐

##### Participação dos pais

- Durante a nossa permanência a equipe perguntou regularmente sobre como estávamos nos sentindo ☐
- A equipe nos envolveu ativamente na tomada de decisões sobre cuidado e tratamento do nosso filho ☐
- Fomos incentivados a permanecer perto do nosso filho ☐
- Tínhamos confiança nos médicos ☐
- Tínhamos confiança nos enfermeiros ☐
- Sempre pudemos permanecer perto do nosso filho, mesmo durante os procedimentos ☐

##### Atitude profissional

- Recebemos apoio dos médicos ☐
- Recebemos apoio dos enfermeiros ☐
- A equipe trabalhou com higiene ☐
- A equipe respeitou a privacidade do nosso filho e a nossa ☐
- A equipe demonstrou respeito por nosso filho e por nós ☐
- Fomos bem acolhidos na chegada à UTI ☐

Faixa de pontuação: 0 = não se aplica 1-6 (1 = certamente não; 6 = certamente sim)
